# Supplementary material
Source: Springer Nature journal article supplement (https://www.springermedizin.de/resource/supplementary/12936_2003_49_MOESM6_ESM.pdf/9546756)

**No GA**

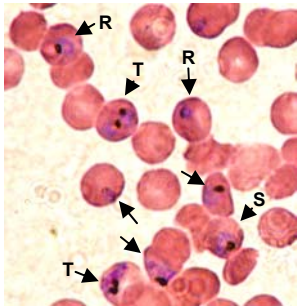

**40 nM GA**

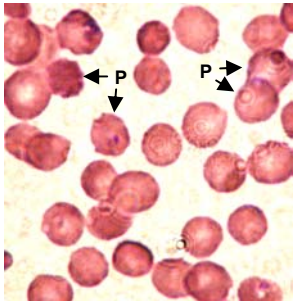

Supplement: MOESM6 [file 9546756]
